# Supplementary material
Source: bioRxiv or medRxiv preprint supplement (http://medrxiv.stage.highwire.org/highwire/filestream/70179/field_highwire_adjunct_files/7/19012054-8.pdf)
Supplement: Supplementary file [file 19012054-8.pdf]

## **Online Resource 8**

Pre-season screening currently has no value for injury prediction: The development and internal validation of a multivariable prognostic model to predict indirect muscle injury risk in elite football (soccer) players. Sports Medicine.

Hughes, T., Riley, R.D. Sergeant, J.C., Callaghan, M.J. (2019)

**Corresponding author: Tom Hughes**

Email: [tom.hughes.physio@manutd.co.uk](mailto:tom.hughes.physio@manutd.co.uk)

Correspondence address: Manchester United Football Club, AON Training Complex, Birch Road, Off  
Isherwood Road, Carrington, Manchester. UK. M31 4BH.  
Tel: 0161 868 8754

# Full internal validation results - primary analysis using imputed data

| Variable                  | Mean         | SD           | Min           | Max          |
|---------------------------|--------------|--------------|---------------|--------------|
| C index (Apparent)        | 0.701        | 0.016        | 0.628         | 0.762        |
| C Index (Test)            | 0.640        | 0.007        | 0.584         | 0.653        |
| <b>C Index (Optimism)</b> | <b>0.061</b> | <b>0.013</b> | <b>0.006</b>  | <b>0.115</b> |
| CITL (Apparent)           | 0.000        | 0.000        | 0.000         | 0.000        |
| CITL (Test)               | -0.031       | 0.196        | -0.234        | 0.319        |
| <b>CITL (Optimism)</b>    | <b>0.031</b> | <b>0.196</b> | <b>-0.319</b> | <b>0.234</b> |
| Slope (Apparent)          | 1.000        | 0.000        | 1.000         | 1.000        |
| Test Slope (Test)         | 0.663        | 0.047        | 0.488         | 1.013        |
| <b>Slope (Optimism)</b>   | <b>0.337</b> | <b>0.047</b> | <b>-0.013</b> | <b>0.512</b> |

*Key: SD=standard deviation; min= minimum value; max= maximum value; CITL= calibration in the large. Note: Apparent performance is the performance of the bootstrap model in the bootstrap dataset; test performance is the performance of the bootstrap model in the original dataset.*
